# Supplementary material for: Non-photochemical catalytic hydrolysis of methyl parathion using core–shell Ag@TiO2 nanoparticles
Source: Royal Society of Chemistry journal article supplement (doi:10.1039/c8ra09553a), 2018-01-01
Supplement: c8ra09553a1.pdf [file c8ra09553a1.pdf]

# Supplementary Information

## Non-photochemical catalytic hydrolysis of methyl parathion using core-shell Ag@TiO<sub>2</sub> nanoparticles

*Somayeh Talebzadeh, Florian Forato, Bruno Bujoli, Scott A. Trammell, Stéphane Grolleau, Hemant*

*Pal, Clémence Queffélec, Andrew D. Knight*

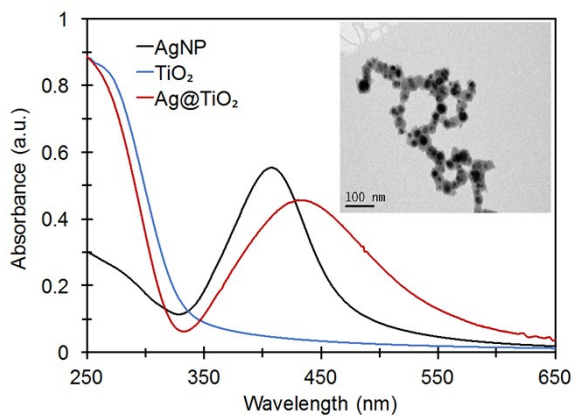

**Figure S1.** UV-Vis absorption spectra of Ag, TiO<sub>2</sub> and Ag@TiO<sub>2</sub> nanoparticles and TEM image of Ag@TiO<sub>2</sub> (inset).

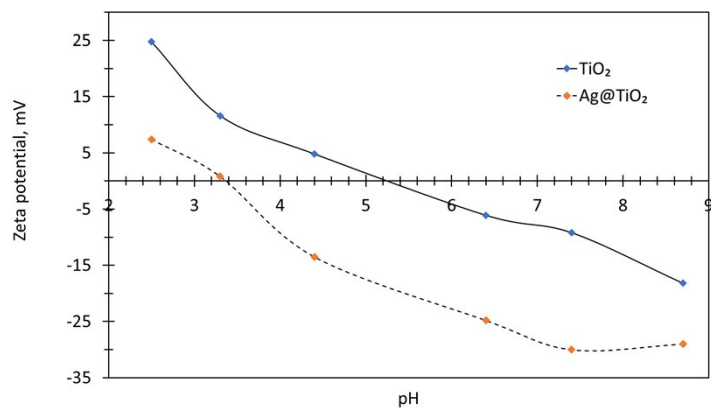

**Figure S2.** Zeta potential-pH relationship for TiO<sub>2</sub> and Ag@TiO<sub>2</sub>.

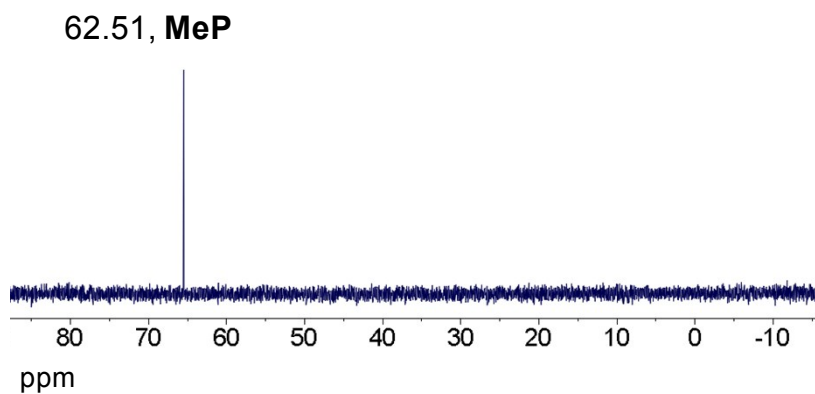

**Figure S3.** <sup>31</sup>P NMR spectrum of methyl parathion after 24 hours (5% MeOH/MOPS, pH = 8.0) (in the absence of Ag@TiO<sub>2</sub>),  $\delta$ : 65.51 ppm (MeP). Assignments based on literature values.<sup>1-2</sup>

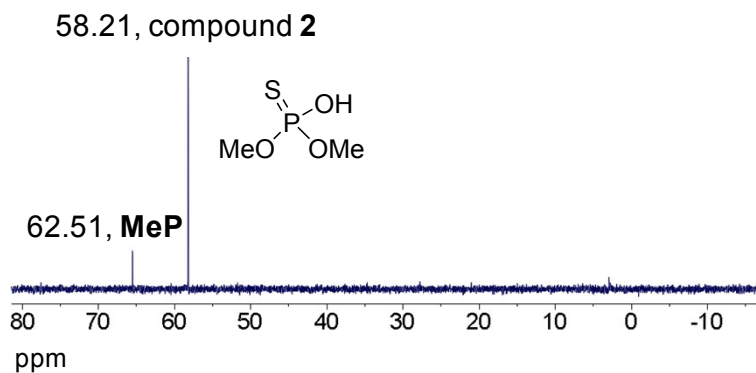

**Figure S4.**  $^{31}\text{P}$  NMR spectrum of methyl parathion +  $\text{Ag@TiO}_2$  after 24 hours (5% MeOH/MOPS, pH = 8.0).  $\delta$ : 65.51 ppm (MeP), 58.21 (compound 2, Figure S1). Assignments based on literature values.<sup>1-2</sup>

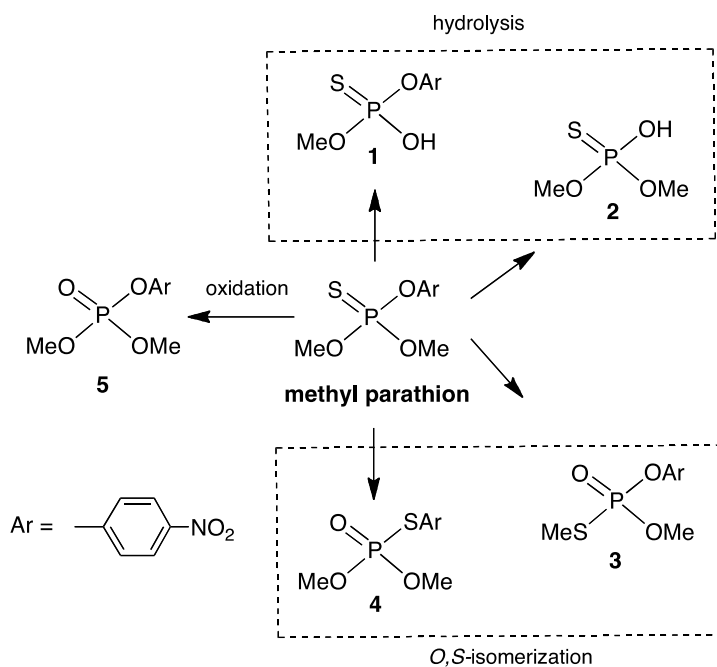

**Figure S5.** Non-photochemical breakdown products of methyl parathion.

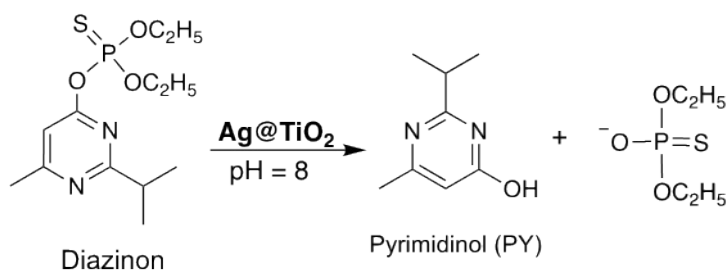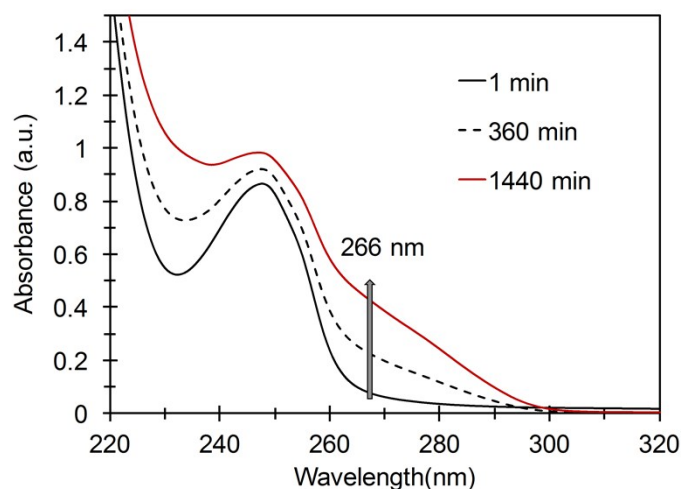

**Figure S6.** UV-Vis for diazinon + Ag@TiO<sub>2</sub> (5% MeOH/MOPS, pH = 8.0) at different interval times and after removal of the catalyst. The spectra of the catalytic mixtures after removal of Ag@TiO<sub>2</sub> showed a constant increase in absorbance at 266 nm indicating an increase in the concentration of pyrimidinol (PY).

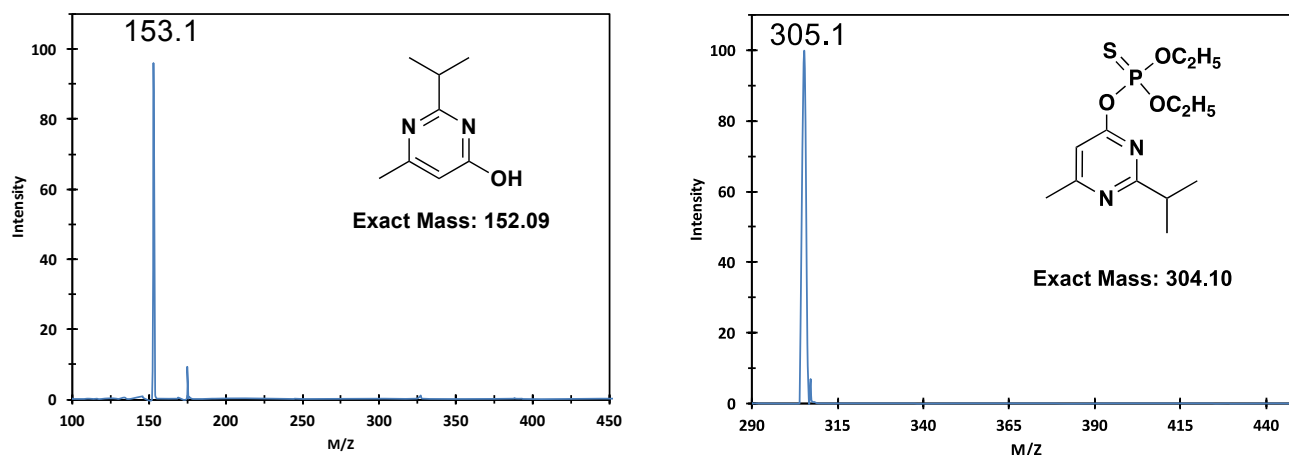

**Figure S7.** LC-MS analysis of diazinon + Ag@TiO<sub>2</sub> after 24 hours (5% MeOH/MOPS, pH = 8.0). Spectrum from APCI-MS in positive mode, (304.10 *m/z*; Calcd for [M+H]<sup>+</sup>; 305.1 *m/z*) and product PY (152.09 *m/z*; Calcd for [M+H]<sup>+</sup>; 153.1 *m/z*).<sup>3</sup>

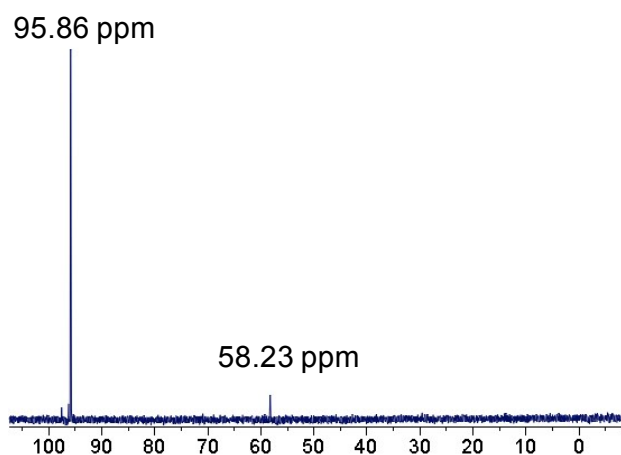

**Figure S8.** <sup>31</sup>P NMR spectrum of malathion + Ag@TiO<sub>2</sub> after 24 hours (5% MeOH/MOPS, pH = 8.0). δ: 95.86 (malathion), 58.23 ([P(S)(OMe)<sub>2</sub>(OH)]). Assignments based on literature values.<sup>4</sup>

## References

1. Lange, L. E.; Obendorf, S. K., *J. Environ. Chem. Eng.* **2015**, 3 (1), 541-547.
2. Seger, M. R.; Maciel, G. E., *J. Environ. Chem. Eng.* **2006**, 40 (2), 552-558.
3. Kouloumbos, V. N.; Tsiipi, D. F.; Hiskia, A. E.; Nikolic, D.; van Breemen, R. B., *J. Am. Soc. Mass. Spectrom.* **2003**, 14 (8), 803-817.
4. Koskela, H., *J. Chromatogr. B* **2010**, 878 (17), 1365-1381.
